# Supplementary material for: Safety profile and cellular uptake of biotemplated nanocapsules with nanometre-thin walls
Source: Royal Society of Chemistry journal article supplement (doi:10.1039/c1nr10311c), 2011-01-01
Supplement: c1nr10311c.pdf [file c1nr10311c.pdf]

# Supplementary Material (ESI) for Nanoscale  
# This journal is (c) The Royal Society of Chemistry 2011

## **Lipid covering enhances cell permeability of biocompatible nanocapsules with nanometer-thin walls**

Qunfang Zhou , Sergey A. Dergunov , Yi Zhang , Xi Li , Qingxin Mu , Qiu Zhang , Guibin  
Jiang , Eugene Pinkhassik and Bing Yan \*

### **Supporting information**

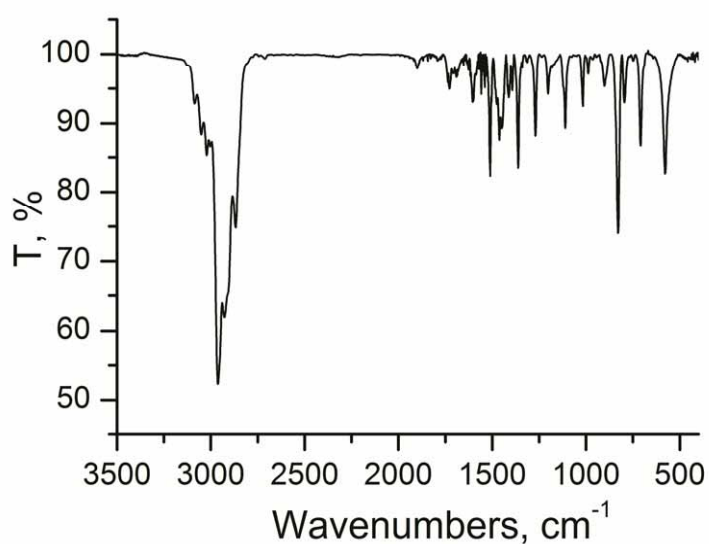

Figure 1: FTIR spectra of nanocapsule 2.
